# Supplementary material for: Structural insights into cardiolipin transfer from the Inner membrane to the outer membrane by PbgA in Gram-negative bacteria
Source: PubMed Central journal article supplement (PMC4973235; doi:10.1038/srep30815), 2016-08-04
Supplement: srep30815-s1.pdf [file srep30815-s1.pdf]

**Structural insights into cardiolipin transfer from the Inner membrane to the outer  
membrane by PbgA in Gram-negative bacteria**

**Haohao Dong<sup>1§</sup>, Zhengyu Zhang<sup>1§</sup>, Xiaodi Tang<sup>2§</sup>, Shihai Huang<sup>1,3</sup>, Huanyu Li<sup>1</sup>, Bo Peng<sup>1</sup>,  
Changjiang Dong<sup>1\*</sup>**

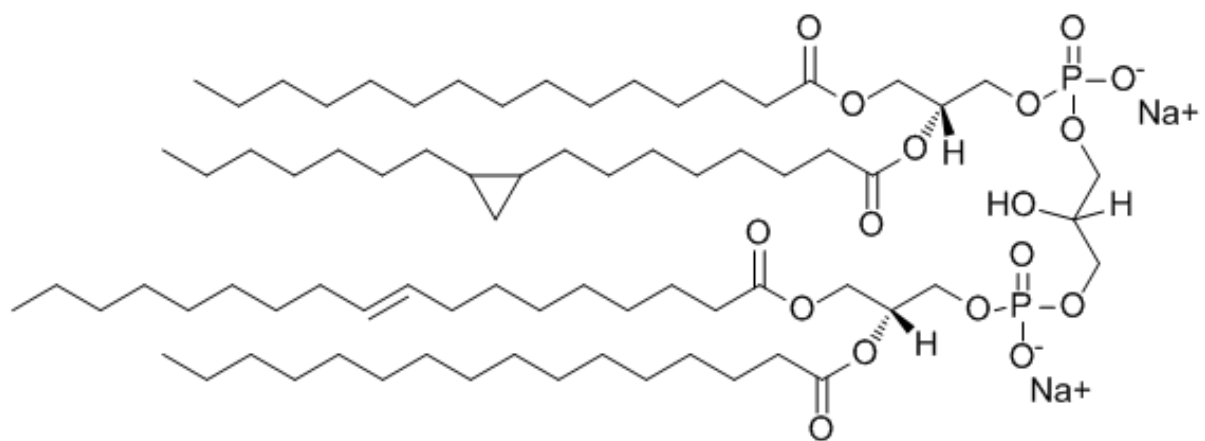

**Figure S1. Structure of cardiolipin.**

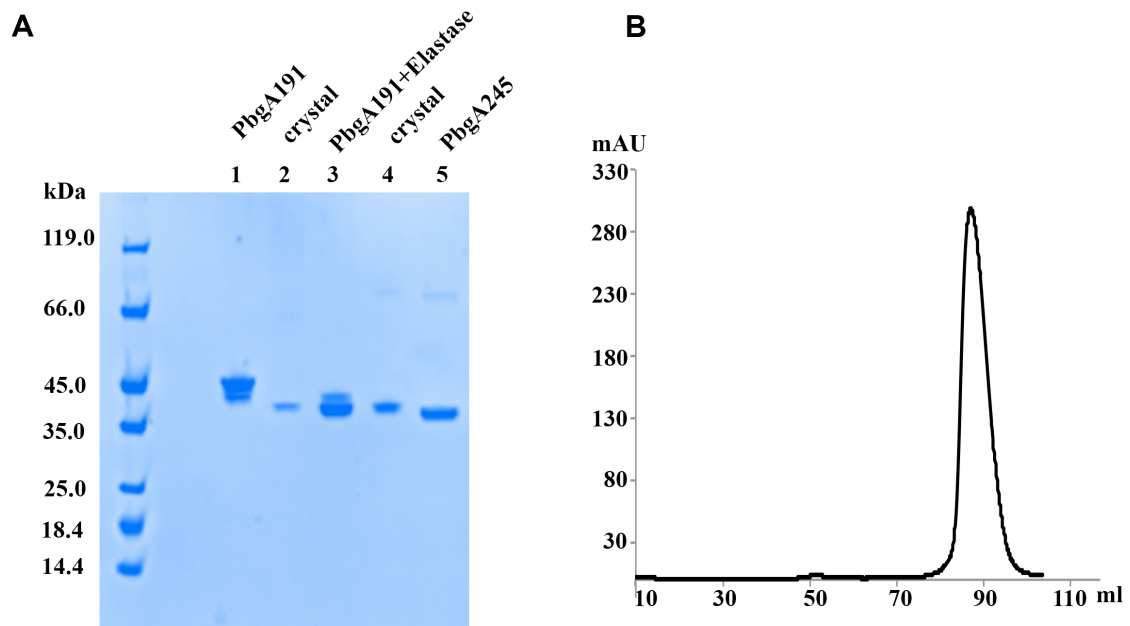

**Figure S2. SDS-PAGE of purified *StPbgA* and crystals and the gel filtration chromatography of the *StPbgA245-586*.** (A) SDS-PAGE of purified PbgA proteins and crystals from the *Salmonella*. 1, purified *StPbgA191-585* protein, 2, crystals from the *StPbgA191-585* protein, indicating the protein was cleaved during crystallization. 3, *StPbgA191-585* was digested with elastase for 2hrs at room temperature at 1:100 mole ratio. 4, crystals from the *StPbgA191* after elastase digestion. 5. Purified protein *StPbgA245-586*. (B) The gel filtration chromatograph of the *StPbgA245-586*.

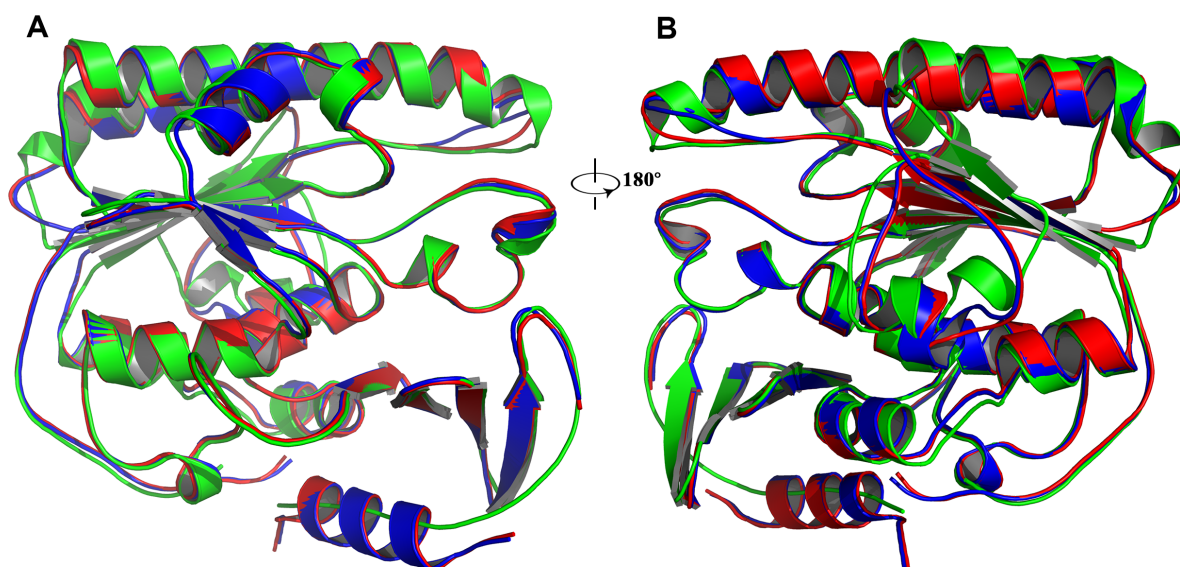

**Figure S3.** The structures of *StPbgA245-586*, *StPbgA191-586* and *EcPbgA245-586* are very similar. The three structures of *StPbgA245-586* (red), *StPbgA191-586* (blue) and *EcPbgA245-586* (green) are superimposed well with RMSD of 0.405 Angstrom over 338 Ca atoms between *StPbgA245-586*, *StPbgA191-586*, and RMSD of 1.08 angstrom over 310 Ca atoms between *StPbgA245-586* and *EcPbgA245-586*. (A) The three structures are superimposed. (B) The figure a rotates 180° along y axis.
